# Supplementary material
Source: Springer Nature journal article supplement (http://www.springermedizin.de/resource/supplementary/13075_2010_9695_MOESM2_ESM.pdf/9693554)
Supplement: MOESM2 [file 9693554]

Identification

Screening

Eligibility

Included

Records identified through database searching (n = 629)

Additional records identified through other sources (n = 4)

- Hand searching (n=3)
- Experts search (n=1)

Records after duplicates removed (n = 430)

Records screened (n = 430)

Records excluded after screening title/abstract (n = 410)

- Topics related to drugs (n = 14)
- Topics related to surgery (n = 12)
- Not rehab for hand OA (n = 119)
- Not OA related (n= 263)
- Abstract or poster (n = 2)

Full-text articles assessed for eligibility (n = 20)

Full-text articles excluded (n = 10)

- Papers with no placebo group (n = 8)
- Paper not RCT or quasi (n = 1)
- Non English (n = 1)

Studies included in qualitative synthesis (n = 10)
